# Supplementary material for: When superfluidity meets superconductivity - extraction of 3He isotope from liquid helium
Source: Research Square preprint supplement (doi:10.21203/rs.3.rs-4613870/v1), 2024-11-12
Supplement: Supplementary file 1 [file a418bc81dcdf9e4469fbd298.docx]

**Supplementary Information**

**Supplementary videos**

**SI Video 1. Thermomechanical effect (*fountain effect*)**. The experiment was performed in a laminar regime with the use of the insert shown in Extended Data

Fig. 2 without a pyrex part (marked “1” in Extended Data Fig. 2 b). Due to the low efficiency of the YBCO-123 entropy filter, the video shows the operation of an entropy filter made of MWCNTs.

**SI Video 2. The efficiency of the filter as a volumetric flow vs time.** The experiment was performed with the use of the insert shown in Extended Data Fig. 2. Due to the low efficiency of the YBCO-123 entropy filter, the video shows the operation of an entropy filter made of MWCNTs.
