# Supplementary material for: When superfluidity meets superconductivity - extraction of 3He isotope from liquid helium
Source: Research Square preprint supplement (doi:10.21203/rs.3.rs-4613870/v1), 2024-11-12
Supplement: Supplementary file 2 [file c801fe5b7126bd0bc2929d48.docx]

**Extended Data**

**
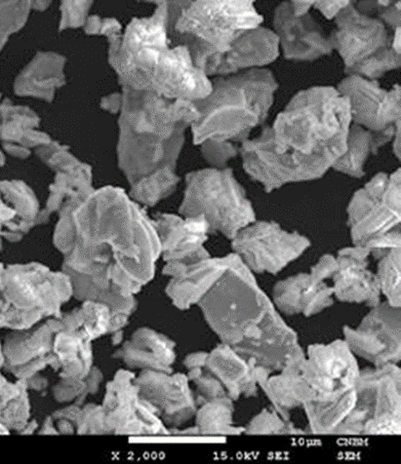
**

**Extended Data Fig. 1. SEM image of YBCO-123 micro-sized powder.** The image was obtained with Jeol 7001TTLS scanning electron microscope, at 15 kV accelerating voltage with the use of a secondary electron detector. For better visibility YBCO-123 granules were dispersed on a silicon substrate.


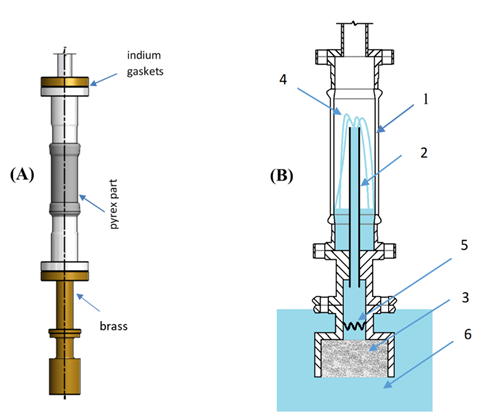


**a**

**b**

**Extended Data Fig. 2. Construction of the glass cryostat insert for efficiency measurements.** a) – external view of the device with an indication of the materials used. b) – schematic representation of the device’s interior. Pyrex part **1** of known volume allows direct observation of superfluid component transfer through the capillary **2** and measures the efficiency of YBCO-123 filter **3** via *the* *fountain effect* **4** generated by the heater **5** immersed in superfluid helium **6**. The heater is the resistor:

128 ohm at RT and 124 ohms at 4.2 K, placed in a downstream direction.

**
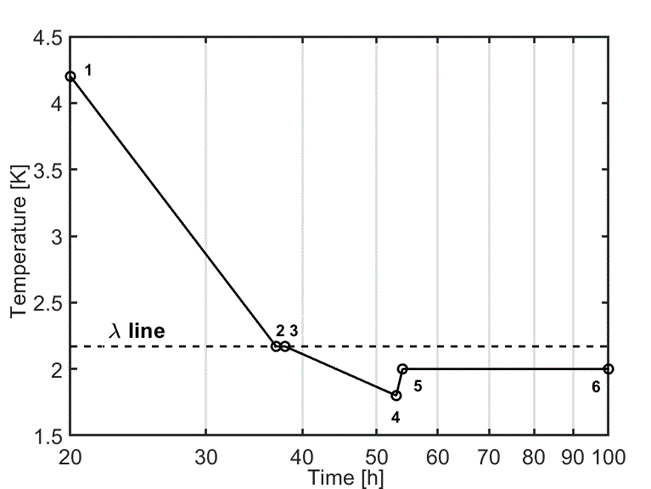
**

**Extended Data Fig. 3. Cooling process below 4.2 K.** Regions 1-4 show the almost monotonous temperature decreases down to about 1.7 K with a short flattening at 2-3 which is called the *lambda front* – described in detail in19. Region 4-5 shows the start of the *fountain effect*. The extremely high thermal conductivity of superfluid helium21 allows us to assume that heat transfer from the heater to the YBCO-123 entropy filter is lossless. Finally, region 5-6 shows temperature stabilization as thermomechanical pumping (*the* *fountain effect*) continues. The initial power of the heater was stabilized at 70 mW.

**
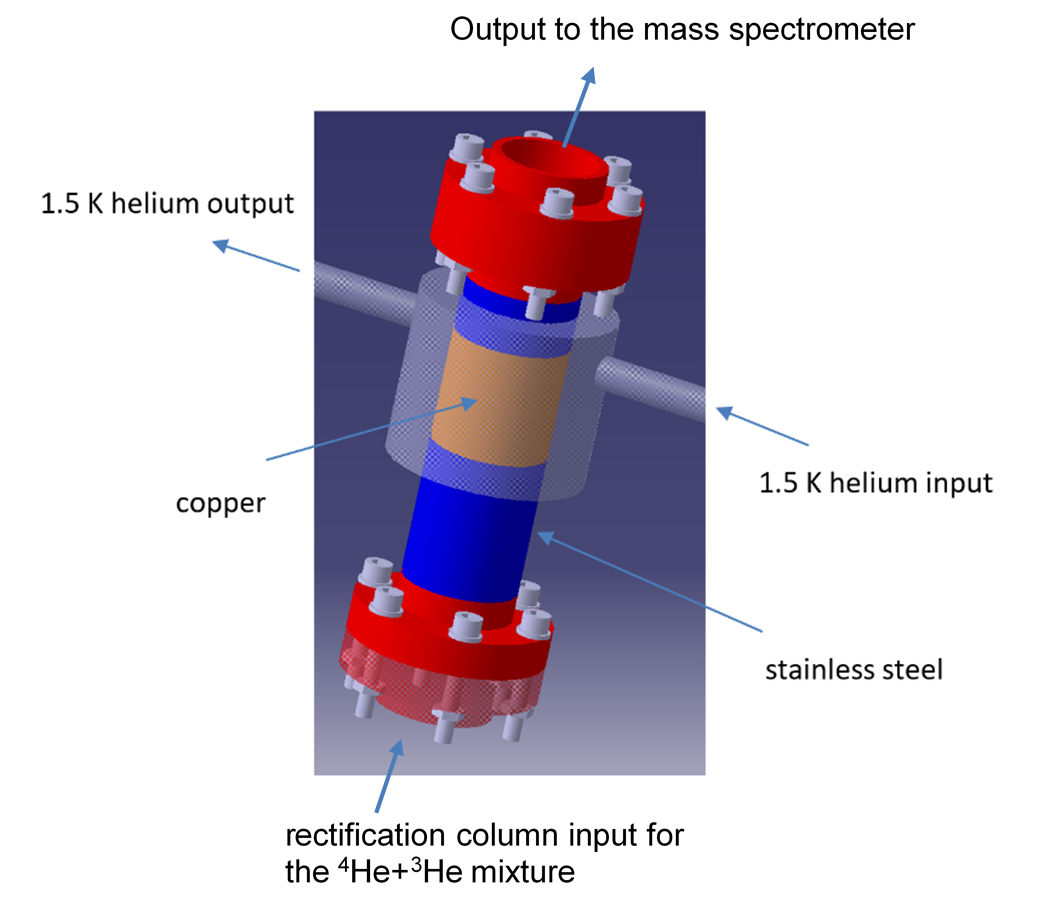
**

**Extended Data Fig. 4. Schematic presentation of the rectification column.** The temperature of the copper part is stabilized by the flowing liquid helium with the temperature at the level of 1.5 K.


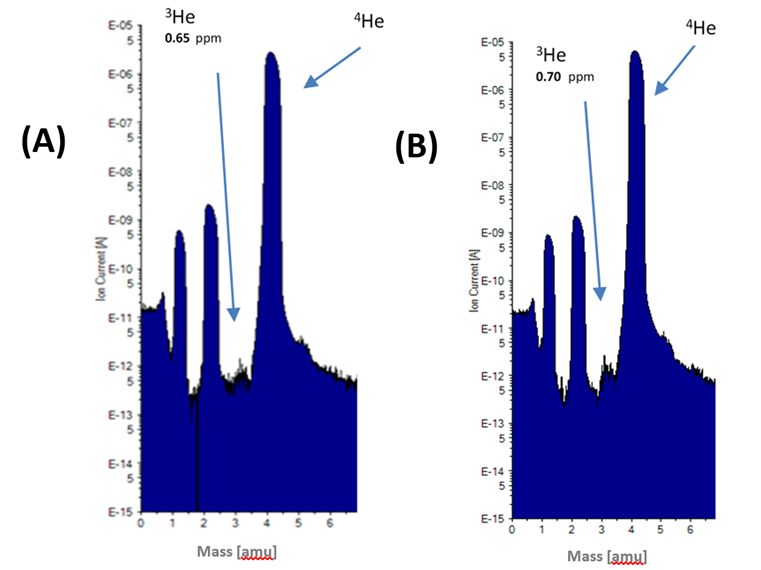


**a**

**b**

**Extended Data Fig. 5. Mass spectra below (a) and above (b)** **λ-transition.** Spectra were registered for the rectification column from figure Extended Data Fig. 4**.** a) mass spectrum for 1.93 Kat the bottom of columnand b) mass spectrum for 3.3 K at the bottom of the column. The separation efficiency depends little on whether the rectification is below or above λ-transition. The presence of hydrogen peaks at masses 1 and 2 are explained in our previous paper19.
